# Supplementary material for: Dissecting the Genetic Architecture of Melon Chilling Tolerance at the Seedling Stage by Association Mapping and Identification of the Elite Alleles
Source: PubMed Central journal article supplement (PMC6220089; doi:10.3389/fpls.2018.01577), 2018-10-31
Supplement: Image_1.pdf [file Image_1.pdf]

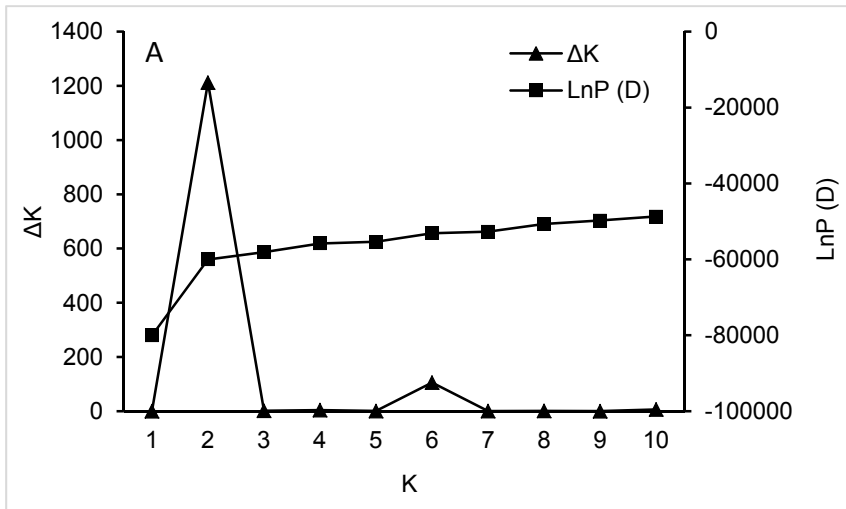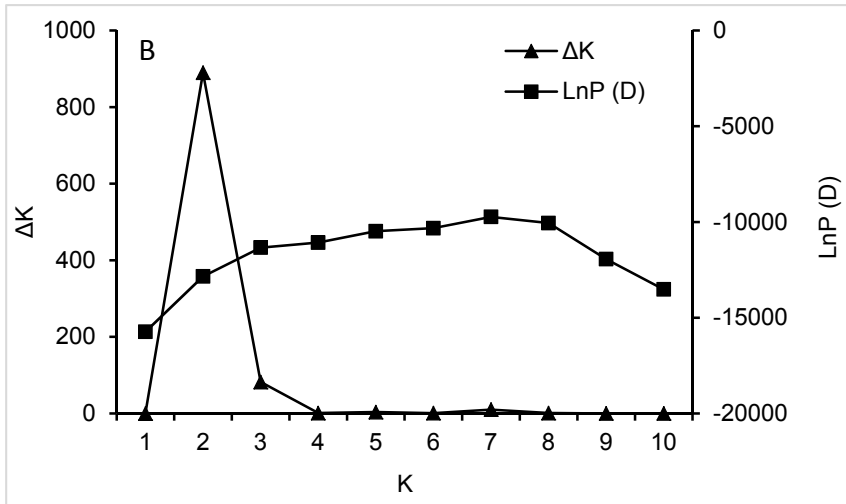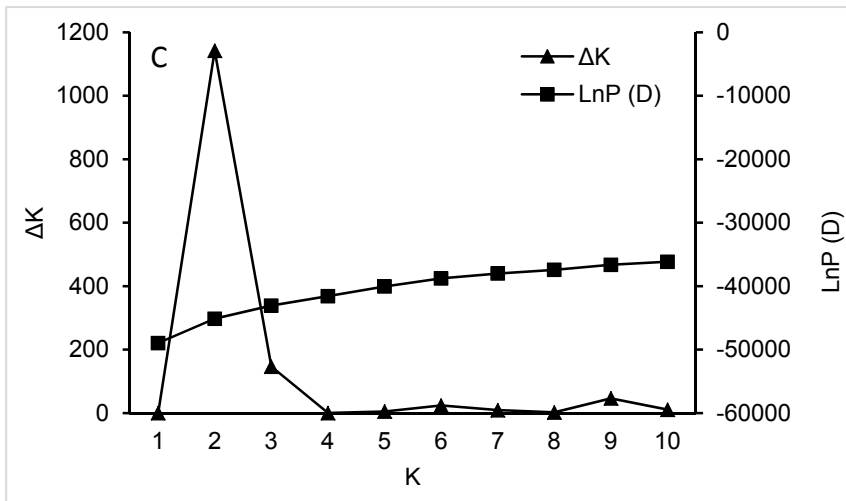

**FIGURE S1** | Estimation of the optimal number (K) of subpopulations for the whole panel (A), *melo* group (B), and *agrestis* group (C) using a Log probability data [ $\text{LnP}(D)$ ] and  $\Delta K$ .
