# Supplementary material for: Dissecting the Genetic Architecture of Melon Chilling Tolerance at the Seedling Stage by Association Mapping and Identification of the Elite Alleles
Source: PubMed Central journal article supplement (PMC6220089; doi:10.3389/fpls.2018.01577), 2018-10-31
Supplement: Image_2.pdf [file Image_2.pdf]

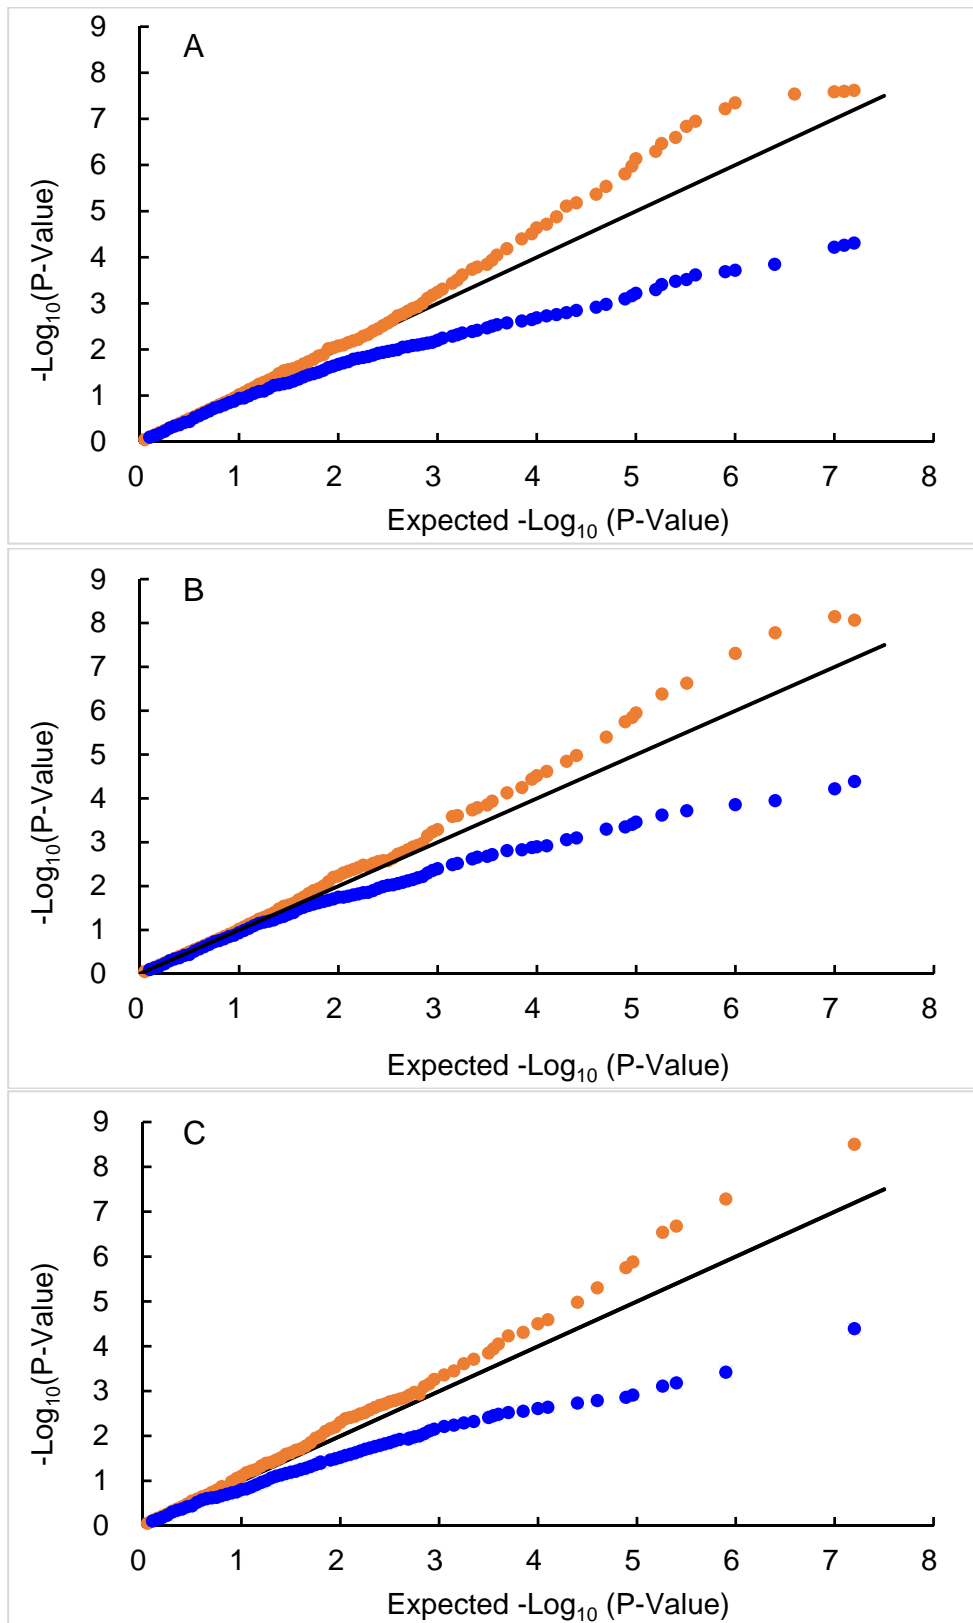

**Figure S2** | Quantile-quantile plots of the GLM and MLM from association mapping in the whole panel (A), *melo* group (B), and *agrestis* group (C). ● GLM; ● MLM
